# Supplementary material for: Type VI Secretion System and Its Effectors PdpC, PdpD, and OpiA Contribute to Francisella Virulence in Galleria mellonella Larvae
Source: PubMed Central journal article supplement (PMC8208517; doi:10.1128/iai.00579-20), 2021-06-16
Supplement: iai.00579-20-s0001.pdf [file iai.00579-20-s0001.pdf]

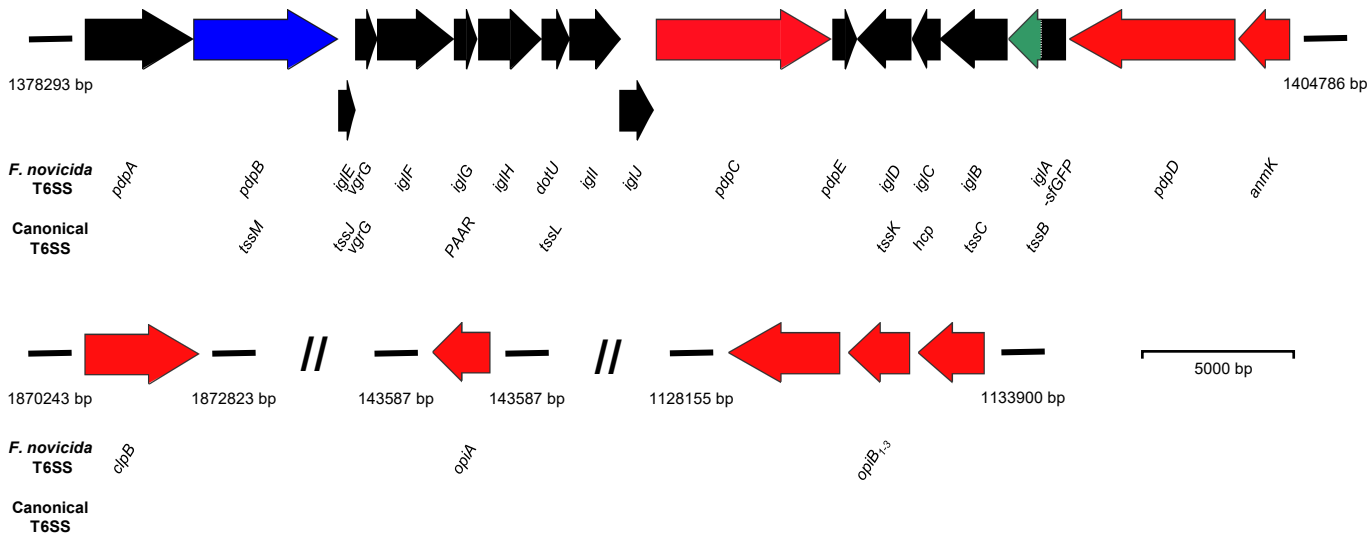

**Figure S1: Scheme of *F. novicida* T6SS encoding genes (FPI, *clpB* and T6SS dependent secreted components *opiA* and *opiB*<sub>1-3</sub>). Gene functions are assigned based on literature cited in the main text. *Francisella* and canonical T6SS nomenclature is shown. In black: genes that are not discussed in this study. In red: genes of interest, which were in-frame deleted for this study. In blue: *pdpB*, in-frame deletion of this gene was used as T6SS negative control. Green represents fluorophore sfGFP, which was used to visualize sheath component *igjA*. Genes are drawn in scale.**

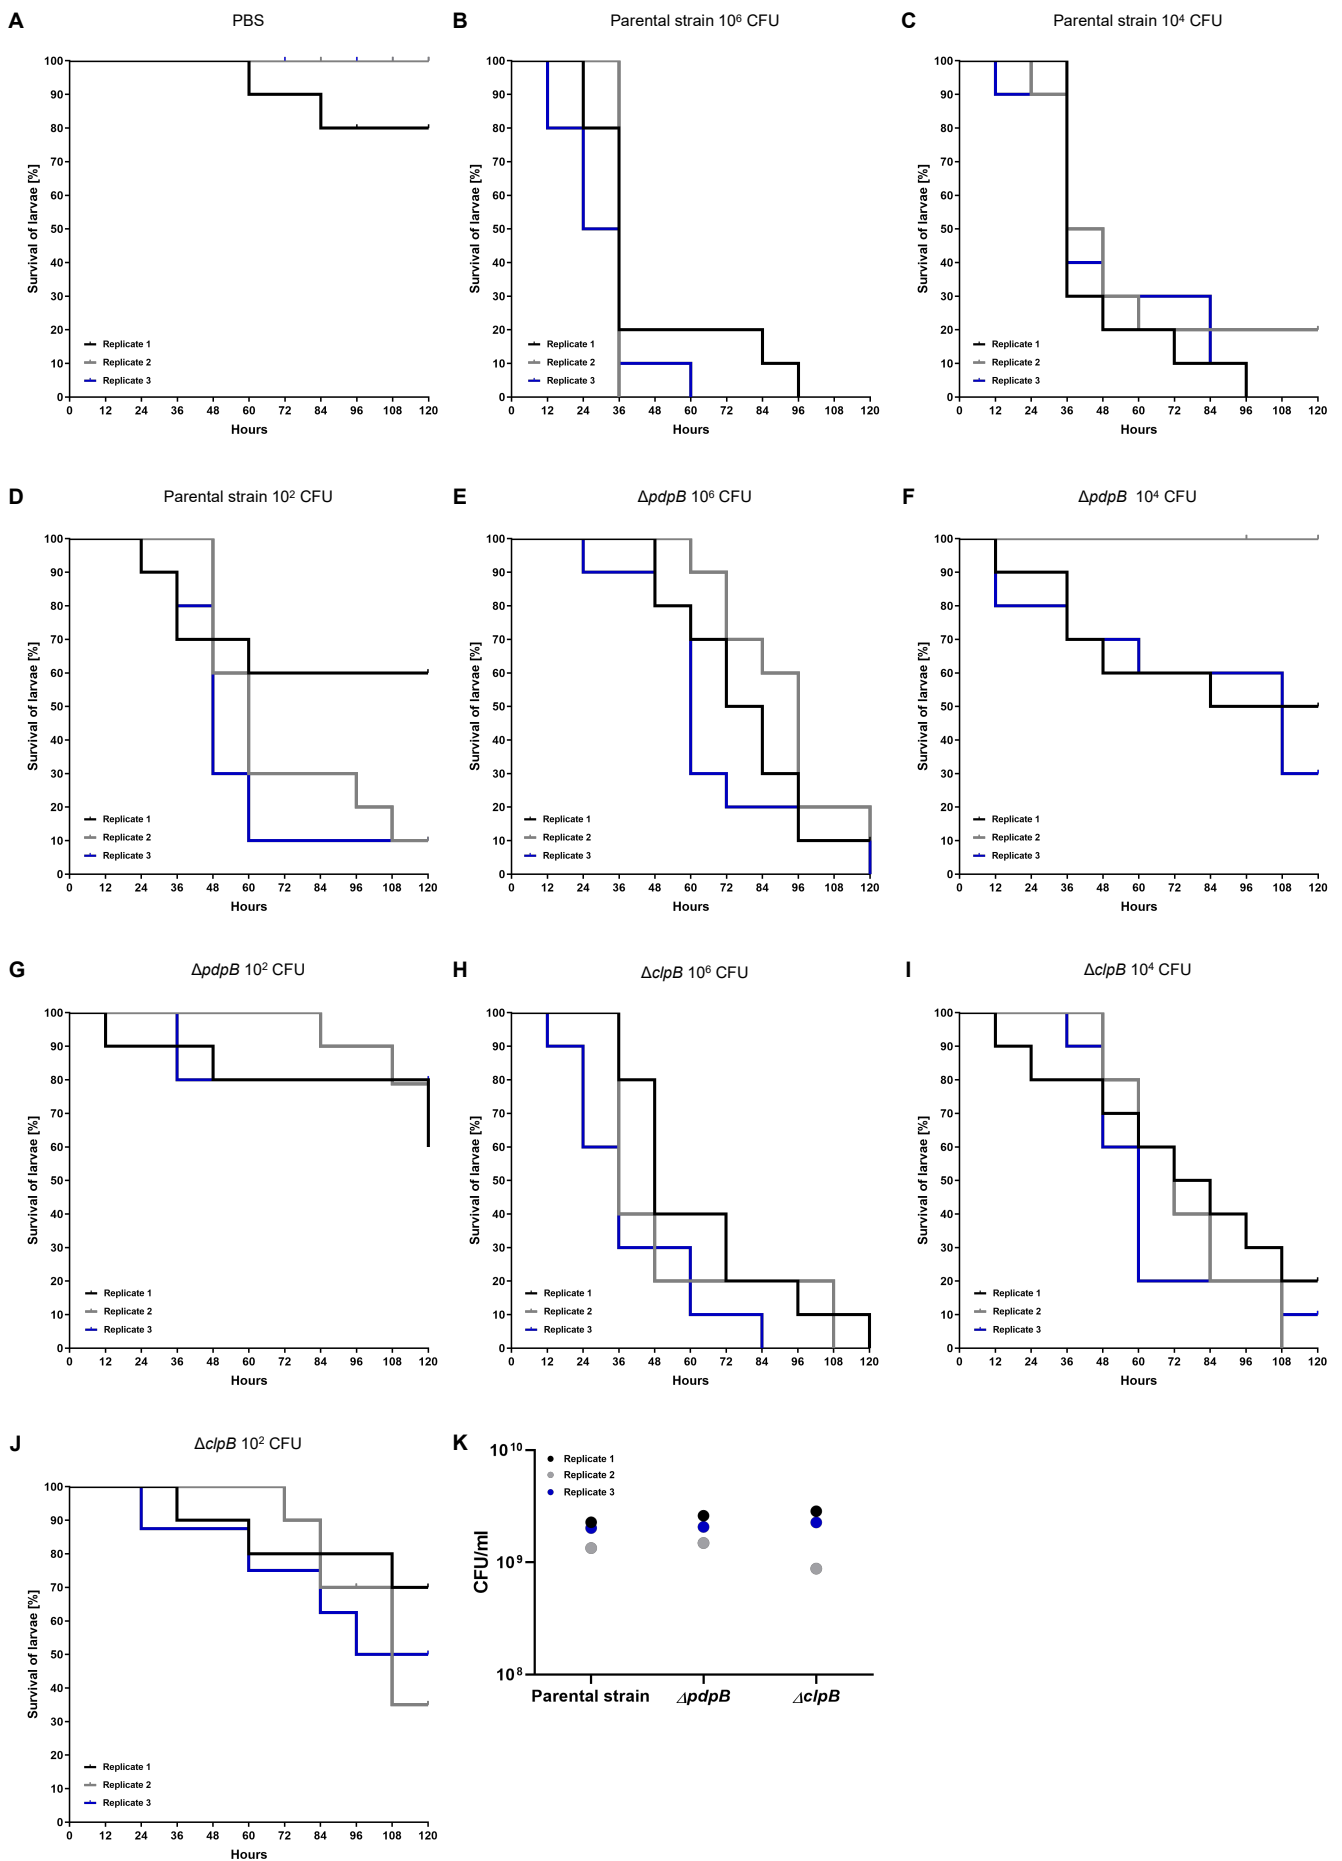

**Figure S2: Individual survival curves for Figure 2.** Individual survival curves of three individual experiments. Black: replicate 1, grey: replicate 2, blue: replicate 3. State of larvae was monitored every 12 h. Pupating larvae were censored (dashes). *G. mellonella* larvae ( $n_0=10$ ) were treated with **A**) PBS and infected with **B-D**) *F. novicida* U112 *iglA-sfGFP* (parental strain), **E-G**)  $\Delta pdpB$  (T6SS negative control) and **H-J**)  $\Delta clpB$  with a calculated infection inocula of **B, E, H**)  $10^6$  CFU, **C, F, I**)  $10^4$  CFU and **D, G, J**)  $10^2$  CFU. **K**) CFU concentrations of the used infection inocula at  $OD_{600}$  of 1 for the individual experiments.

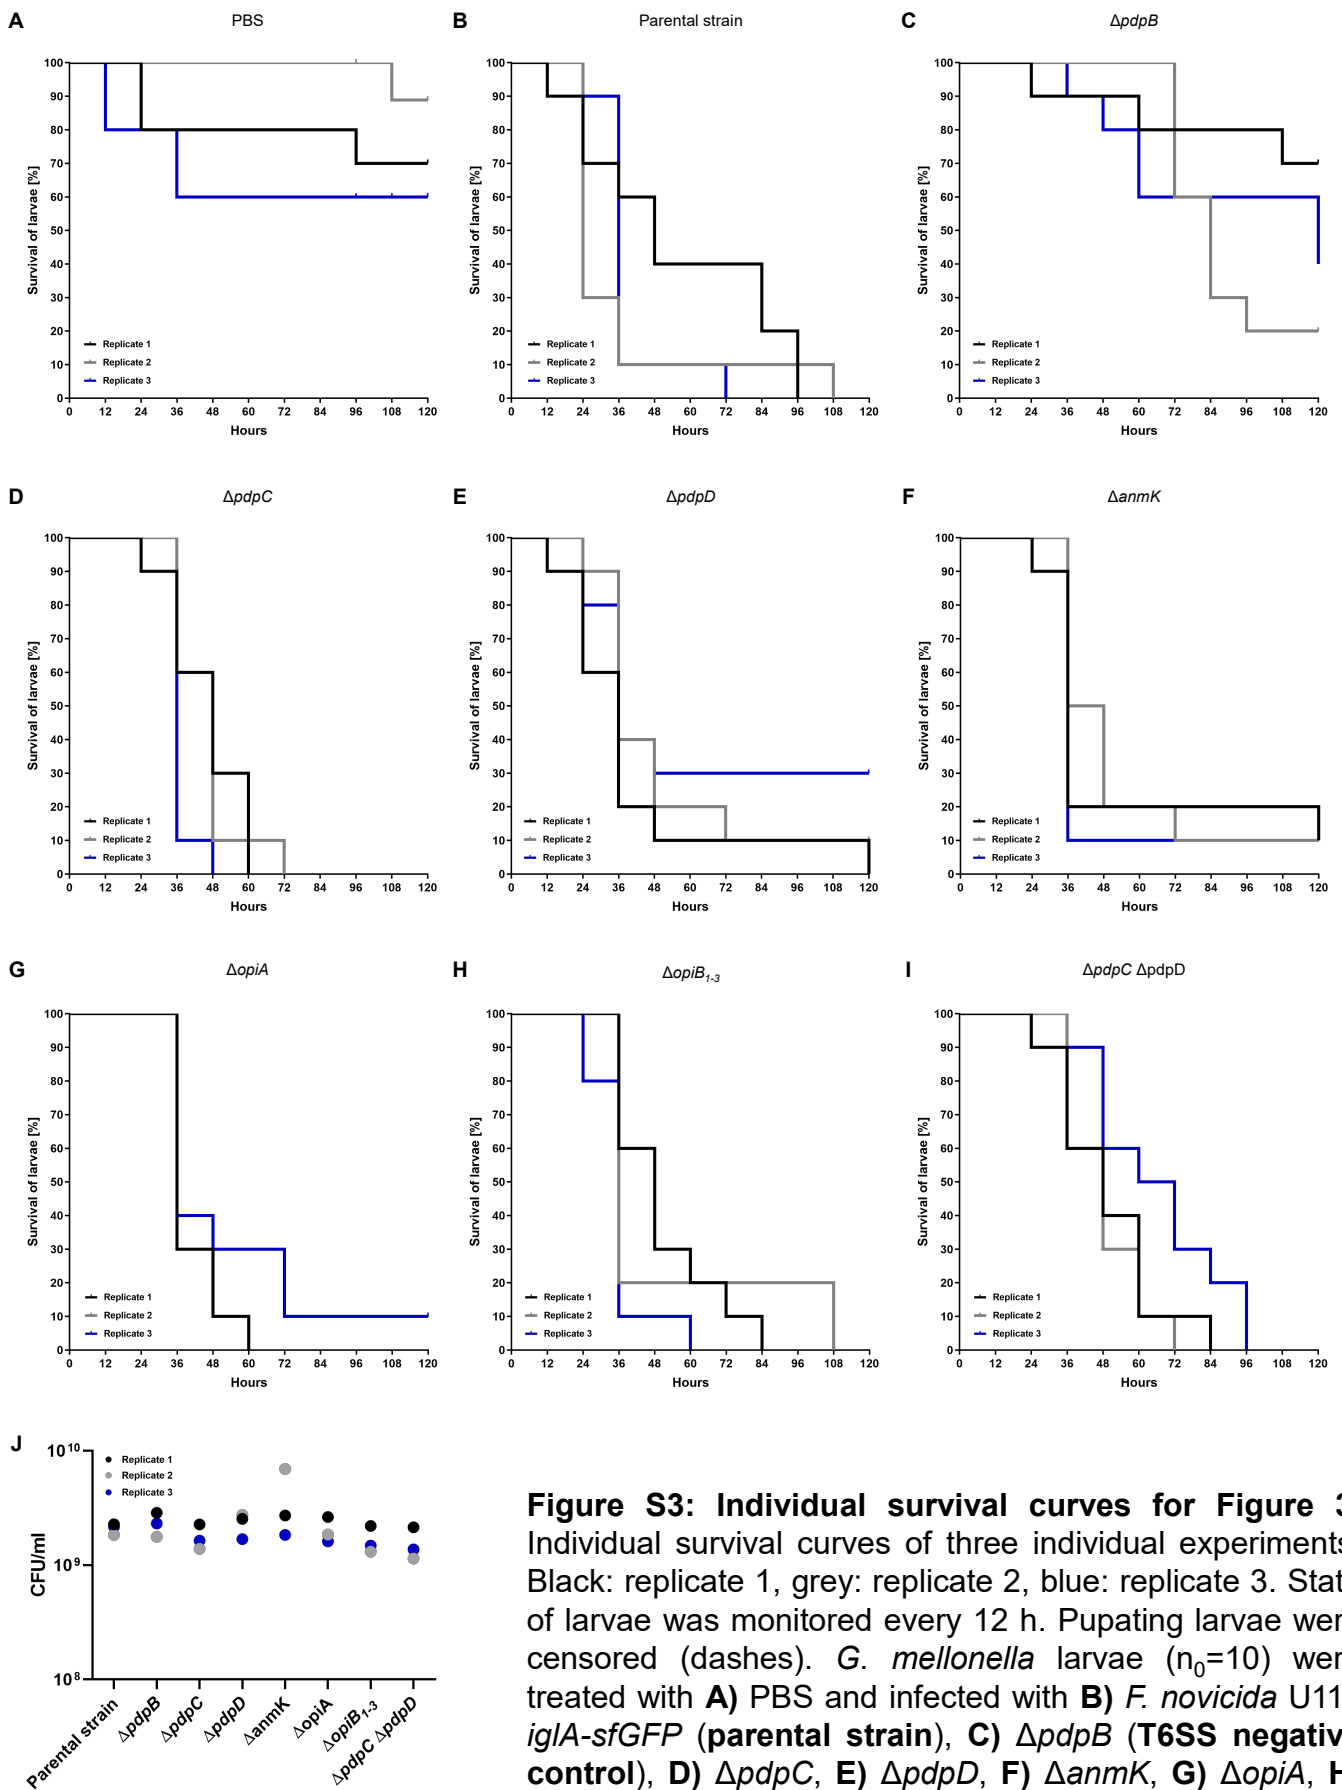

**Figure S3: Individual survival curves for Figure 3.** Individual survival curves of three individual experiments. Black: replicate 1, grey: replicate 2, blue: replicate 3. State of larvae was monitored every 12 h. Pupating larvae were censored (dashes). *G. mellonella* larvae ( $n_0=10$ ) were treated with **A**) PBS and infected with **B**) *F. novicida* U112 *iglA-sfGFP* (parental strain), **C**)  $\Delta pdpB$  (T6SS negative control), **D**)  $\Delta pdpC$ , **E**)  $\Delta pdpD$ , **F**)  $\Delta anmK$ , **G**)  $\Delta opiA$ , **H**)  $\Delta opiB_{1-3}$  and **I**)  $\Delta pdpC \Delta pdpD$ . **J**) CFU concentrations of the used infection inocula at OD<sub>600</sub> of 1 for the individual experiments.

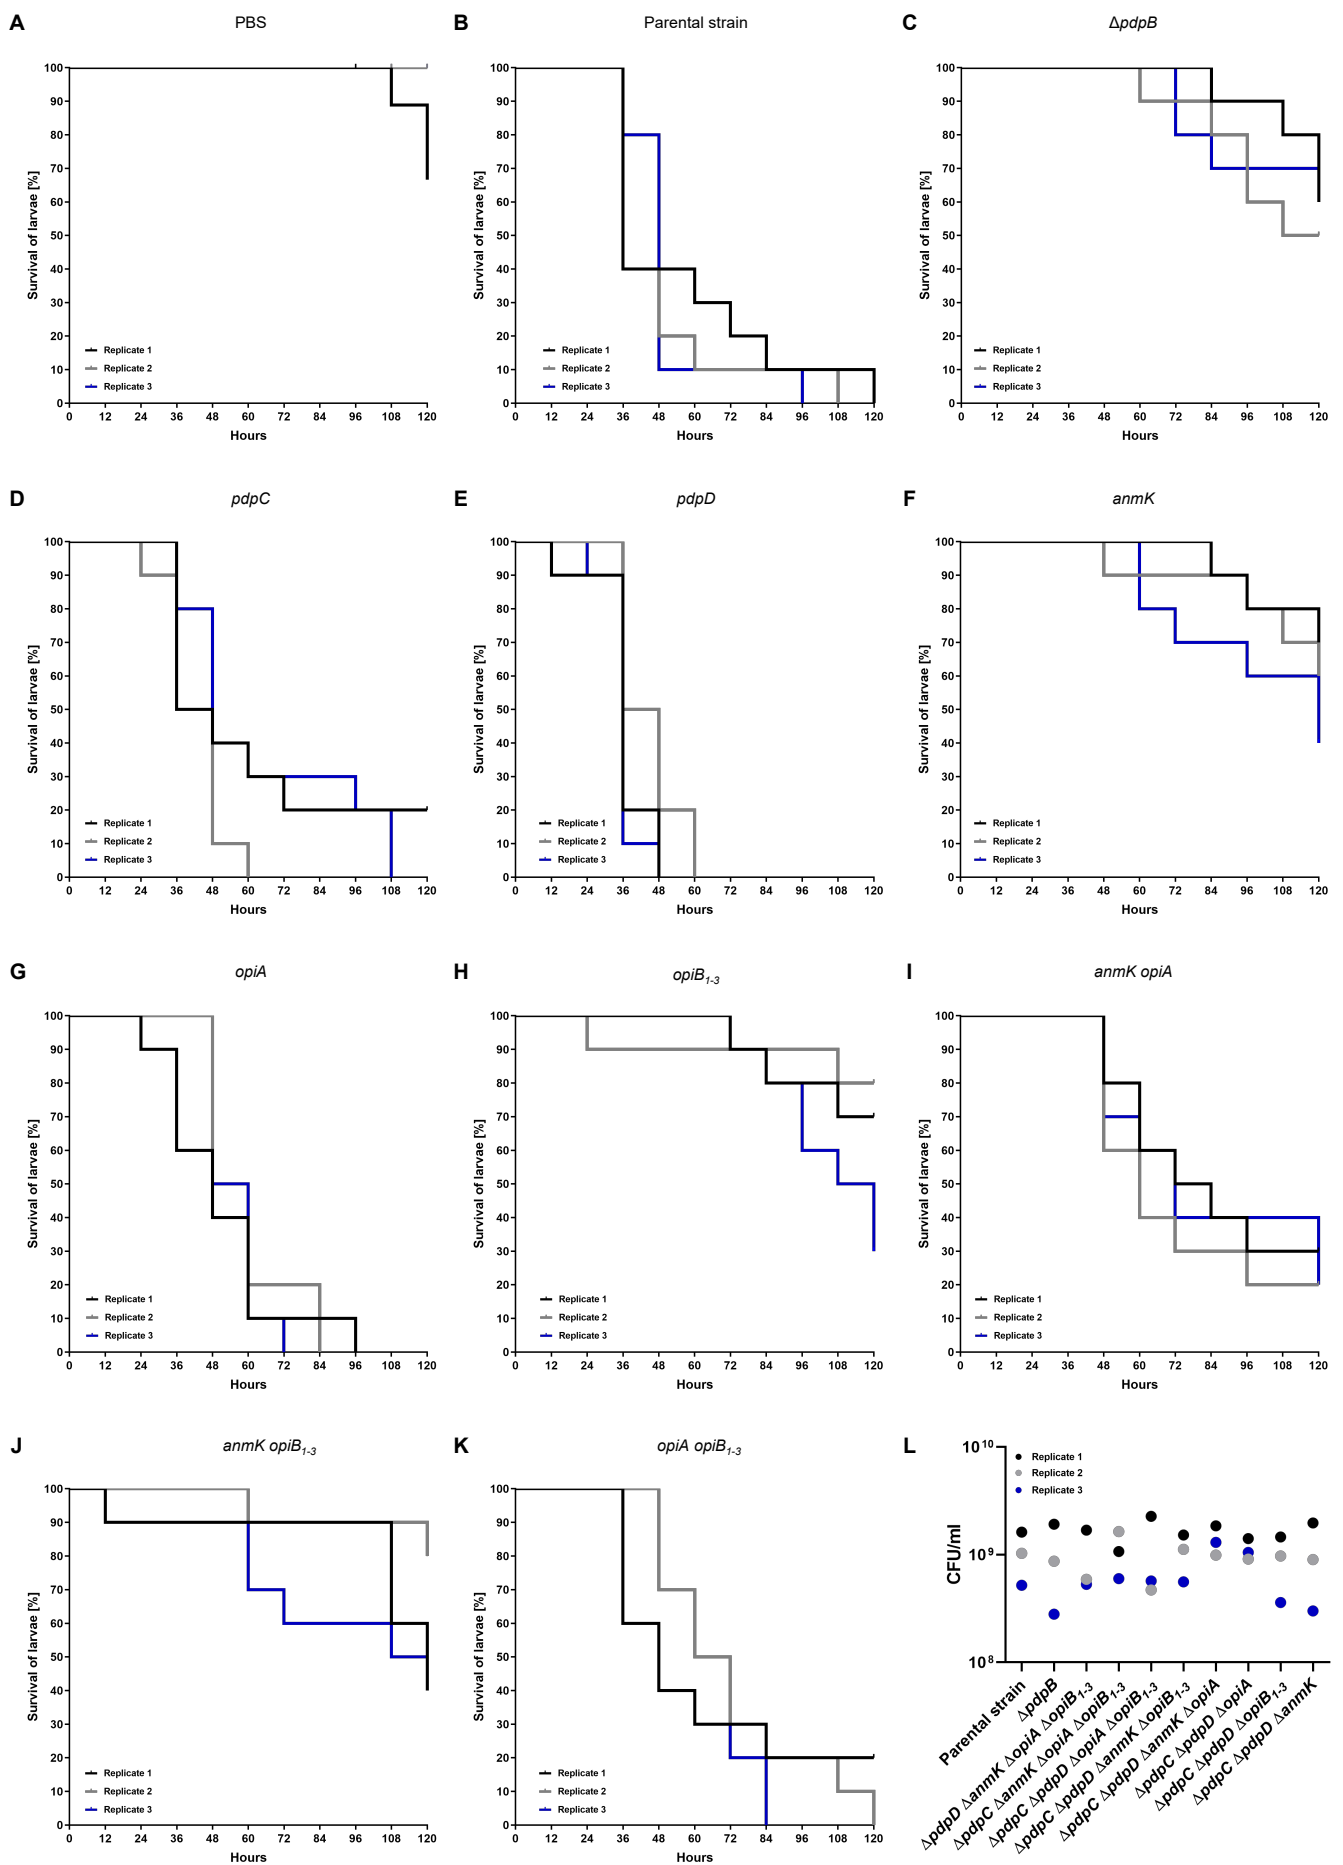

**Figure S4: Individual survival curves for Figure 4.** Individual survival curves of three individual experiments. Black: replicate 1, grey: replicate 2, blue: replicate 3. State of larvae was monitored every 12 h. Pupating larvae were censored (dashes). *G. mellonella* larvae ( $n_0=10$ ) were treated with **A**) PBS and infected with **B**) *F. novicida* U112 *iglA*-sfGFP (parental strain), **C**)  $\Delta pdpB$  (T6SS negative control), **D**)  $\Delta pdpD\ \Delta anmK\ \Delta opiA\ \Delta opiB_{1-3}$  (*pdpC*), **E**)  $\Delta pdpC\ \Delta anmK\ \Delta opiA\ \Delta opiB_{1-3}$  (*pdpD*), **F**)  $\Delta pdpC\ \Delta pdpD\ \Delta opiA\ \Delta opiB_{1-3}$  (*anmK*), **G**)  $\Delta pdpC\ \Delta pdpD\ \Delta anmK\ \Delta opiB_{1-3}$  (*opiA*), **H**)  $\Delta pdpC\ \Delta pdpD\ \Delta anmK\ \Delta opiA$  (*opiB\_{1-3}*), **I**)  $\Delta pdpC\ \Delta pdpD\ \Delta opiB_{1-3}$  (*anmK\ opiA*), **J**)  $\Delta pdpC\ \Delta pdpD\ \Delta opiA$  (*anmK\ opiB\_{1-3}*) and **K**)  $\Delta pdpC\ \Delta pdpD\ \Delta anmK$  (*opiA\ opiB\_{1-3}*). **L**) CFU concentrations of the used infection inocula at OD<sub>600</sub> of 1 for the individual experiments.

# Supplemental movies

- **Movie S1: Functional T6SS dynamics in parental strain and mutants.** T6SS dynamics (IglA-sfGFP) was monitored in *F. novicida* U112 *iglA-sfGFP* (**parental strain**),  $\Delta pdpB$  (**T6SS negative control**),  $\Delta clpB$ ,  $\Delta pdpC$ ,  $\Delta pdpD$ ,  $\Delta anmK$ ,  $\Delta opiA$ ,  $\Delta opiB_{1-3}$ ,  $\Delta pdpC \Delta pdpD$ ,  $\Delta pdpD \Delta anmK \Delta opiA \Delta opiB_{1-3}$  (**pdpC**),  $\Delta pdpC \Delta anmK \Delta opiA \Delta opiB_{1-3}$  (**pdpD**),  $\Delta pdpC \Delta pdpD \Delta opiA \Delta opiB_{1-3}$  (**anmK**),  $\Delta pdpC \Delta pdpD \Delta anmK \Delta opiB_{1-3}$  (**opiA**),  $\Delta pdpC \Delta pdpD \Delta anmK \Delta opiA$  (**opiB<sub>1-3</sub>**),  $\Delta pdpC \Delta pdpD \Delta opiB_{1-3}$  (**anmK opiA**),  $\Delta pdpC \Delta pdpD \Delta opiA$  (**anmK opiB<sub>1-3</sub>**) and  $\Delta pdpC \Delta pdpD \Delta anmK$  (**opiA opiB<sub>1-3</sub>**) for 5 min at a frame rate of 2 frames per minute. Two representative time-lapse image series (merge of phase contrast and GFP channel) for each strain are shown. Fields of view are 39 x 26  $\mu m$ . Scale bars represent 5  $\mu m$ . Videos play at a frame rate of 5 frames per second.

- **Movie S2: Detailed examples of individual T6SS assemblies in parental strain and mutants.** T6SS dynamics (IglA-sfGFP) was monitored in *F. novicida* U112 *iglA-sfGFP* (**parental strain**),  $\Delta pdpB$  (**T6SS negative control**),  $\Delta clpB$ ,  $\Delta pdpC$ ,  $\Delta pdpD$ ,  $\Delta anmK$ ,  $\Delta opiA$ ,  $\Delta opiB_{1-3}$ ,  $\Delta pdpC \Delta pdpD$ ,  $\Delta pdpD \Delta anmK \Delta opiA \Delta opiB_{1-3}$  (**pdpC**),  $\Delta pdpC \Delta anmK \Delta opiA \Delta opiB_{1-3}$  (**pdpD**),  $\Delta pdpC \Delta pdpD \Delta opiA \Delta opiB_{1-3}$  (**anmK**),  $\Delta pdpC \Delta pdpD \Delta anmK \Delta opiB_{1-3}$  (**opiA**),  $\Delta pdpC \Delta pdpD \Delta anmK \Delta opiA$  (**opiB<sub>1-3</sub>**),  $\Delta pdpC \Delta pdpD \Delta opiB_{1-3}$  (**anmK opiA**),  $\Delta pdpC \Delta pdpD \Delta opiA$  (**anmK opiB<sub>1-3</sub>**) and  $\Delta pdpC \Delta pdpD \Delta anmK$  (**opiA opiB<sub>1-3</sub>**) for 5 min at a frame rate of 2 frames per minute. Two representative time-lapse image series (merge of phase contrast and GFP channel) for each strain are shown. Fields of view are 3.3 x 3.3  $\mu m$ . Scale bars represent 1  $\mu m$ . Videos play at a frame rate of 5 frames per second.

**Table S1: Strains used in this study, related to Material and methods**

| Organism                            | Genotype                                                | Plasmid                                                                                           | Relevant features                                                                                          | Source     |
|-------------------------------------|---------------------------------------------------------|---------------------------------------------------------------------------------------------------|------------------------------------------------------------------------------------------------------------|------------|
| <i>Francisella novicida</i><br>U112 | <i>iglA-sfGFP</i>                                       |                                                                                                   | C-terminal chromosomal fusion of <i>sfGFP</i> to <i>iglA</i> (parental strain)                             | (1)        |
|                                     | <i>iglA-sfGFP ΔpdpB</i>                                 |                                                                                                   | In-frame deletion of <i>pdpB</i> (T6SS negative control)                                                   | (2)        |
|                                     | <i>iglA-sfGFP ΔiglC</i>                                 |                                                                                                   | In-frame deletion of <i>iglC</i> (negative control for α-IgIC antibody)                                    | (3)        |
|                                     | <i>iglA-sfGFP ΔclpB</i>                                 |                                                                                                   | In-frame deletion of <i>clpB</i>                                                                           | (2)        |
|                                     | <i>iglA-sfGFP ΔpdpC</i>                                 |                                                                                                   | In-frame deletion of <i>pdpC</i>                                                                           | (2)        |
|                                     | <i>iglA-sfGFP ΔpdpD</i>                                 |                                                                                                   | In-frame deletion of <i>pdpD</i>                                                                           | (2)        |
|                                     | <i>iglA-sfGFP ΔanmK</i>                                 |                                                                                                   | In-frame deletion of <i>anmK</i>                                                                           | (2)        |
|                                     | <i>iglA-sfGFP ΔopiA</i>                                 |                                                                                                   | In-frame deletion of <i>opiA</i>                                                                           | This study |
|                                     | <i>iglA-sfGFP ΔopiB<sub>1-3</sub></i>                   |                                                                                                   | In-frame deletion of <i>opiB<sub>1</sub></i> , <i>opiB<sub>2</sub></i> and <i>opiB<sub>3</sub></i>         | This study |
|                                     | <i>iglA-sfGFP ΔpdpC ΔpdpD</i>                           |                                                                                                   | In-frame deletion of <i>pdpC</i> and <i>pdpD</i>                                                           | (2)        |
|                                     | <i>iglA-sfGFP ΔpdpD ΔanmK ΔopiA ΔopiB<sub>1-3</sub></i> |                                                                                                   | In-frame deletion of <i>pdpD</i> , <i>anmK</i> , <i>opiA</i> and <i>opiB<sub>1-3</sub></i> ( <i>pdpC</i> ) | This study |
|                                     | <i>iglA-sfGFP ΔpdpC ΔanmK ΔopiA ΔopiB<sub>1-3</sub></i> |                                                                                                   | In-frame deletion of <i>pdpC</i> , <i>anmK</i> , <i>opiA</i> and <i>opiB<sub>1-3</sub></i> ( <i>pdpD</i> ) | This study |
|                                     | <i>iglA-sfGFP ΔpdpC ΔpdpD ΔopiA ΔopiB<sub>1-3</sub></i> |                                                                                                   | In-frame deletion of <i>pdpC</i> , <i>pdpD</i> , <i>opiA</i> and <i>opiB<sub>1-3</sub></i> ( <i>anmK</i> ) | This study |
|                                     | <i>iglA-sfGFP ΔpdpC ΔpdpD ΔanmK ΔopiB<sub>1-3</sub></i> |                                                                                                   | In-frame deletion of <i>pdpC</i> , <i>pdpD</i> , <i>anmK</i> and <i>opiB<sub>1-3</sub></i> ( <i>opiA</i> ) | This study |
|                                     | <i>iglA-sfGFP ΔpdpC ΔpdpD ΔanmK ΔopiA</i>               |                                                                                                   | In-frame deletion of <i>pdpC</i> , <i>pdpD</i> , <i>anmK</i> and <i>opiA</i> ( <i>opiB<sub>1-3</sub></i> ) | This study |
|                                     | <i>iglA-sfGFP ΔpdpC ΔpdpD ΔopiB<sub>1-3</sub></i>       |                                                                                                   | In-frame deletion of <i>pdpC</i> , <i>pdpD</i> and <i>opiB<sub>1-3</sub></i> ( <i>anmK opiA</i> )          | This study |
|                                     | <i>iglA-sfGFP ΔpdpC ΔpdpD ΔopiA</i>                     |                                                                                                   | In-frame deletion of <i>pdpC</i> , <i>pdpD</i> and <i>opiA</i> ( <i>anmK opiB<sub>1-3</sub></i> )          | This study |
| <i>iglA-sfGFP ΔpdpC ΔpdpD ΔanmK</i> |                                                         | In-frame deletion of <i>pdpC</i> , <i>pdpD</i> and <i>anmK</i> ( <i>opiA opiB<sub>1-3</sub></i> ) | (2)                                                                                                        |            |
| <i>iglA-sfGFP ΔpmrA</i>             |                                                         | In-frame deletion of <i>pmrA</i>                                                                  | This study                                                                                                 |            |

**Table S2: Plasmids and primers used to generate mutants, related to Material and Methods.**

| Plasmid Name                     | Peptide scar [amino acids] | Primers                                                                                                                                         | Sequence 5'-3' [base pairs]                                                                                                                                                                                   |
|----------------------------------|----------------------------|-------------------------------------------------------------------------------------------------------------------------------------------------|---------------------------------------------------------------------------------------------------------------------------------------------------------------------------------------------------------------|
| pDMK3 <i>ΔopiA</i>               | MKNFEVIRKDFFSHLCNLLN*      | dFTN_0131_Xho1_1.FOR<br>dFTN_0131_1.REV<br>dFTN_0131_2.FOR<br>dFTN_0131_Not1_2.REV<br>dFTN_0131_Det.FOR<br>dFTN_0131_Det.REV                    | TCAGTACTCGAGAGTTTATTTTAAATCCACATAAGC<br>TACGCAAAGATTTTCTCATTGTGTAATTGTTG<br>AAATGAGAAAAATCTTTGCGTATTACTTC<br>TCAGTAGCGGCCGCGTCAACCATATAACAAAGGC<br>TCCGGAAAAATATCGTTGGAGT<br>TGGCAGTCTTTAGAGGAGCT             |
| pDMK3 <i>ΔopiB<sub>1-3</sub></i> | MAIDLLKLQKSNGLPGFLL*       | dFTN_1069-71_Xho1_1.FOR<br>dFTN_1069-71_1.REV<br>dFTN_1069-71_2.FOR<br>dFTN_1069-71_Not1_2.REV<br>dFTN_1069-71_Det.FOR<br>dFTN_1069-71_Det1.REV | TCAGTACTCGAGATAATTTATAGTCCTAGTAAAGTTACT<br>AAAACACAAAAAAGTAATGGATTACCAGGA<br>GTAATCCATTACTTTTTGTAGTTTTAATAGATCAATAGC<br>TCAGTAGCGGCCGCAATATCATCTTGAGTTATCGG<br>TTCGTGATCAGCTACAAGGC<br>AGCTTGTAAACCTCCAAGTTCT |
| pDMK3 <i>ΔpmrA</i>               | MRILLAEDDLFVQKDKVIK*       | dFTN_1465_1_Xho1.FOR<br>dFTN_1465_1.REV<br>dFTN_1465_2.FOR<br>dFTN_1465_2_Not1.REV<br>dFTN_1465_Det.FOR<br>dFTN_1465_Det.REV                    | TCAGTACTCGAGATATTTTACCCCTTTTGACTG<br>CTTTGTACAAAAAGATCATCTTCAGCCA<br>GAAGATGATCTTTTGTACAAAAGGATAAAGTAATTAAG<br>TCAGTAGCGGCCGCGATGACAAAAGTATTGACCTGC<br>GGGCGATTGTAGCAAGAAAG<br>CATCCAGCGAACCTTTTTA            |

**References**

1. Clemens DL, Ge P, Lee B-Y, Horwitz MA, Zhou ZH. 2015. Atomic Structure of T6SS Reveals Interlaced Array Essential to Function. *Cell* 160:940–951.
2. Brodmann M, Dreier RF, Broz P, Basler M. 2017. Francisella requires dynamic type VI secretion system and ClpB to deliver effectors for phagosomal escape. *Nat Commun* 8:15853.
3. Brodmann M, Heilig R, Broz P, Basler M. 2018. Mobilizable Plasmids for Tunable Gene Expression in *Francisella novicida*. *Front Cell Infect Microbiol* 8.
